# Supplementary material for: Evolution of Life-Threatening COVID-19 as the SARS-CoV-2 Pandemic Has Progressed
Source: bioRxiv or medRxiv preprint supplement (doi:10.1101/2023.02.15.23285759), 2023-02-16
Supplement: Supplementary file [file media-1.pdf]

## SUPPLEMENTAL MATERIAL

**Table E1:** In-hospital events, medications, and discharge location of persons admitted to Cleveland Clinic Health System hospitals with COVID-19

**Figure E1:** Completeness of follow-up. Red x's represent deaths and blue circles living patients positioned at time of last follow-up, with a closing date of 7/1/2022. **A)** Patients treated in Ohio. **B)** Addition of the 2,216 Florida patients, with their last cross-sectional follow-up as of 1/1/2022. **C)** Patients treated in Ohio, zoomed in at 60 days after hospital admission. **D)** Addition of patients treated in Florida, zoomed in at 60 days after hospital admission.

**Figure E2:** Partial dependency plots of the relationship of predicted 60-day risk-adjusted mortality and age at hospital admission for COVID-19 based on the pre-COVID-19 mortality model incorporating demographics, medical history, medications, and vaccination status (red symbols and line), and the at-admission mortality model, also incorporating symptoms and results of routine laboratory tests at hospital admission, reflecting patients' physiologic response to SARS-CoV-2 (blue symbols and line). Note blunting of the age relationship in the at-admission model vs. pre-COVID-19 model when patients' response to the virus is taken into account.

**Table E1: In-hospital events, medications, and discharge location of persons admitted to Cleveland Clinic Health System hospitals with COVID-19**

| Variable                            | COVID-19<br>Admitted<br>(N=13,327) |             |
|-------------------------------------|------------------------------------|-------------|
|                                     | n <sup>a</sup>                     | No. (%)     |
| <b><i>In-hospital events</i></b>    |                                    |             |
| High-flow oxygen                    | 26,872                             | 4,307 (16)  |
| Mechanical ventilation              | 26,872                             | 2,555 (9.5) |
| Admission to intensive care unit    | 26,872                             | 6,081 (23)  |
| Extracorporeal membrane oxygenation | 26,872                             | 13 (0.048)  |
| <b><i>Medications</i></b>           |                                    |             |
| Steroids                            | 26,872                             | 15,821 (59) |
| Vitamin D                           | 26,872                             | 4,034 (15)  |
| Zinc                                | 26,872                             | 907 (3.4)   |
| Hydroxychloroquine                  | 26,872                             | 637 (2.4)   |
| Tocilizumab                         | 26,872                             | 452 (1.7)   |
| Remdesivir                          | 26,872                             | 211 (0.79)  |
| Lopinavir/Ritonavir                 | 26,872                             | 9 (0.033)   |
| Oral ribavirin                      | 26,872                             | 1 (0.0037)  |
| <b><i>Discharge Location</i></b>    |                                    |             |
| Home                                | 26,164                             | 16,631 (63) |
| Skilled nursing facility            | 26,164                             | 3,489 (13)  |
| Other facility                      | 26,164                             | 962 (3.7)   |
| Died in hospital                    | 26,164                             | 1,503 (5.7) |

a. Patients with data available.

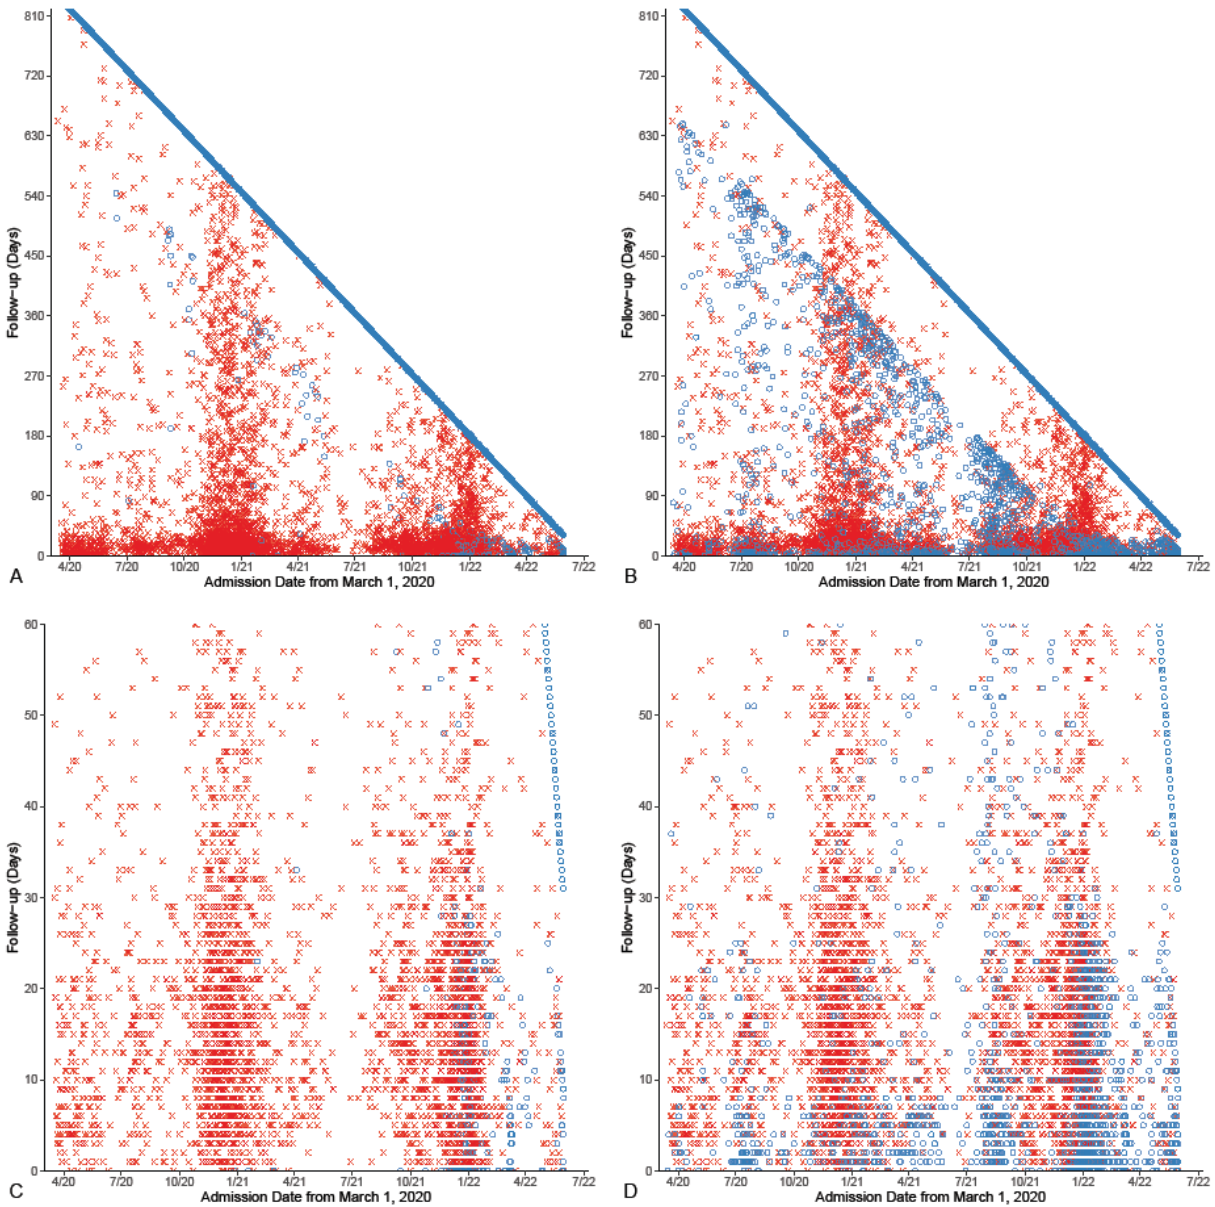

**Figure E1:** Completeness of follow-up. Red x's represent deaths and blue circles living patients positioned at time of last follow-up, with a closing date of 7/1/2022. **A)** Patients treated in Ohio. **B)** Addition of the 2,216 Florida patients, with their last cross-sectional follow-up as of 1/1/2022. **C)** Patients treated in Ohio, zoomed in at 60-days post-

hospital admission. **D)** Addition of patients treated in Florida, zoomed in at 60-days post-hospital admission.

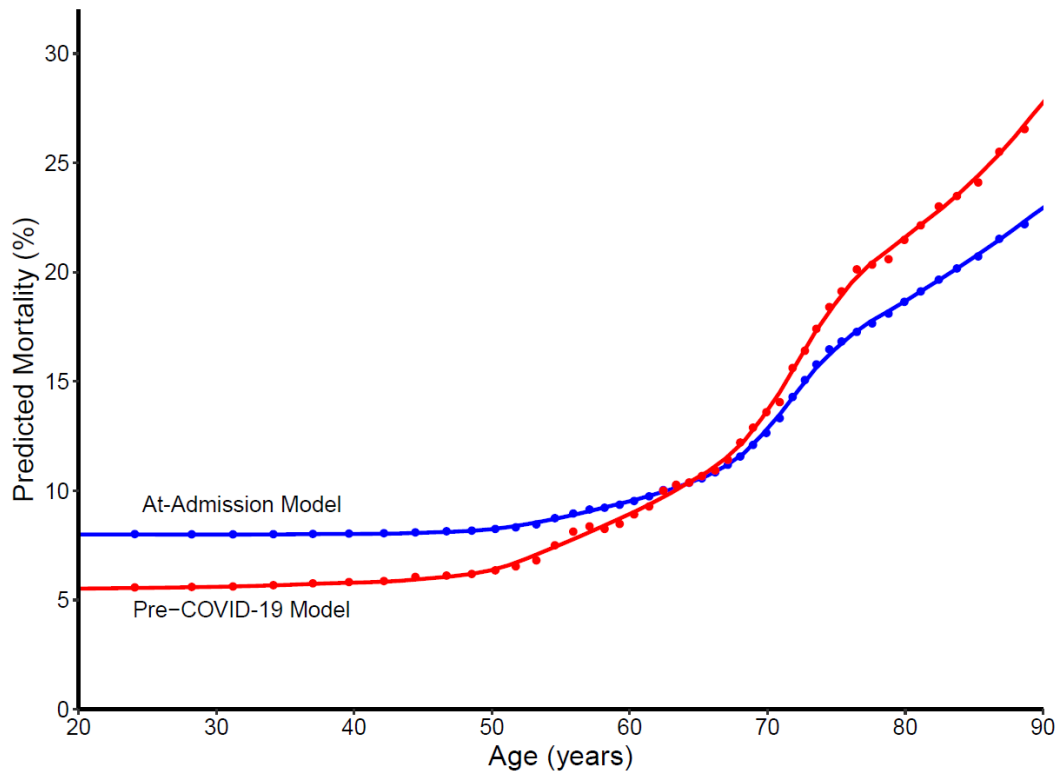

**Figure E2:** Partial dependency plots of the relationship of predicted 60-day risk-adjusted mortality and age at hospital admission for COVID-19 based on the pre-COVID-19 mortality model incorporating demographics, medical history, medications, and vaccination status (red symbols and line), and the at-admission mortality model, also incorporating symptoms and results of routine laboratory tests at hospital admission, reflecting patients' physiologic response to SARS-CoV-2 (blue symbols and line). Note blunting of the age relationship in the at-admission model vs. pre-COVID-19 model when patients' response to the virus is taken into account.
